# Supplementary material
Source: publisher figshare collection journal article supplement (https://gsapubs.figshare.com/articles/dataset/_/16905034)
Supplement: Supplementary file 2 [file 2]

Figure 5 is interactive. Hover over the Th/U>75 (black-red) box and Th/U<75 (green) box in the lower part of the figure to view subset KDEs of each sample. Layers may be viewed separately or in combination using the capabilities of the Acrobat (PDF) layering function (click "Layers" icon along vertical bar on left side of window for display of available layers; turn layers on or off by clicking the box to the left of the layer name). If the interactivity does not work in the version of the paper you are reading, please visit <https://doi.org/10.1130/GEOS.S.16905034>.

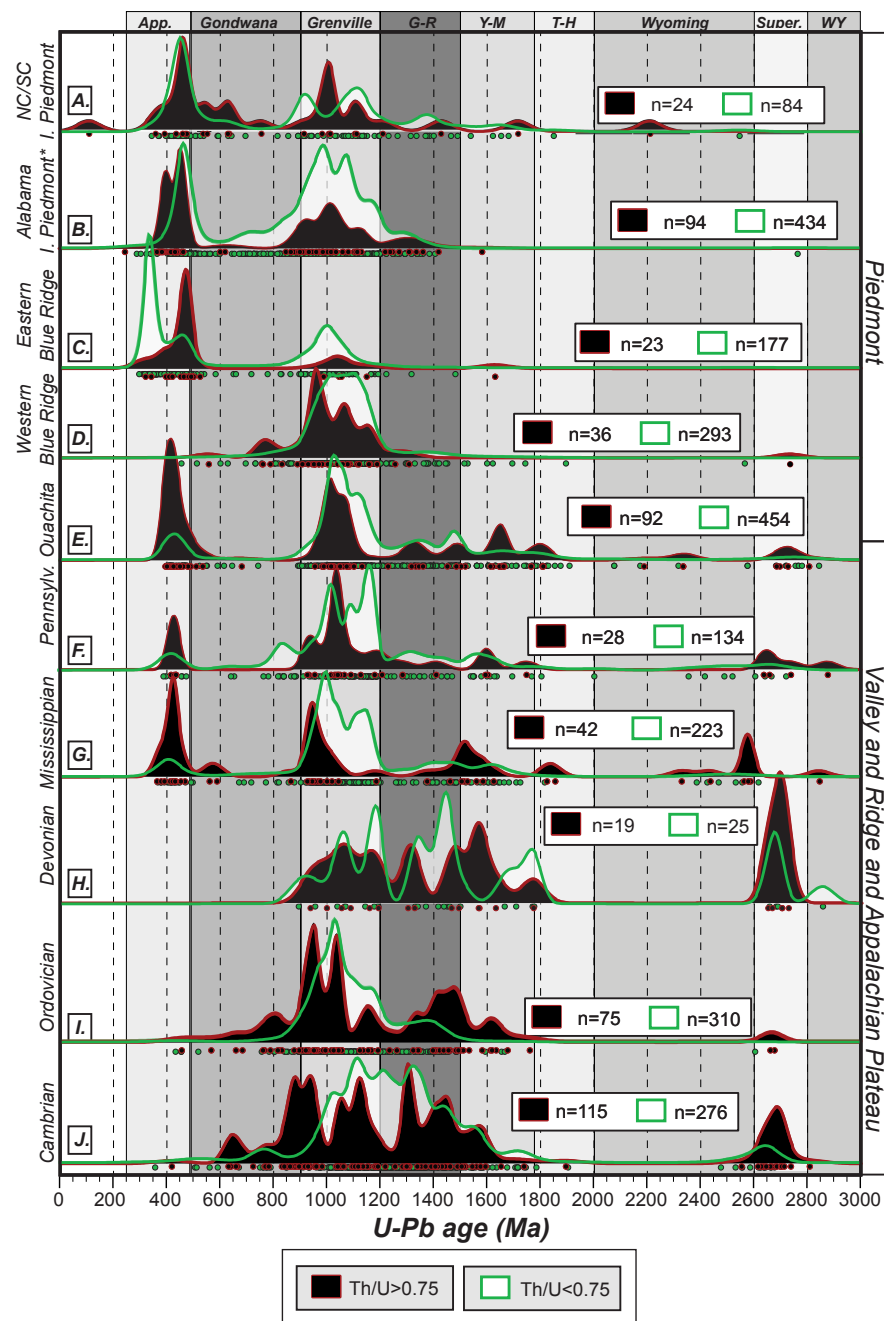

Figure 5. Kernel density estimates (KDEs) of zircon populations divided by Th/U values. High Th/U zircon (>0.75) shown in black-red compared to low Th/U zircon (<0.75) shown in green demonstrate different chemical-age trends that can be correlated between samples. The divided KDEs allow for differentiation of coeval zircon U-Pb ages. Figure 5 is interactive. Hover over the Th/U>75 (black-red) box and Th/U<75 (green) box in the lower part of the figure to view subset KDEs of each sample. Layers may be viewed separately or in combination using the capabilities of the Acrobat (PDF) layering function (click "Layers" icon along vertical bar on left side of window for display of available layers; turn layers on or off by clicking the box to the left of the layer name). If the interactivity does not work in the version of the paper you are reading, please visit <https://doi.org/10.1130/GEOS.S.16905034>.
